# Supplementary material for: An Engineered Receptor-Binding Domain Improves the Immunogenicity of Multivalent SARS-CoV-2 Vaccines
Source: PubMed Central journal article supplement (PMC8262850; doi:10.1128/mbio.00930-21), 2021-05-11
Supplement: mbio.00930-21-sf001.pdf [file mbio.00930-21-sf001.pdf]

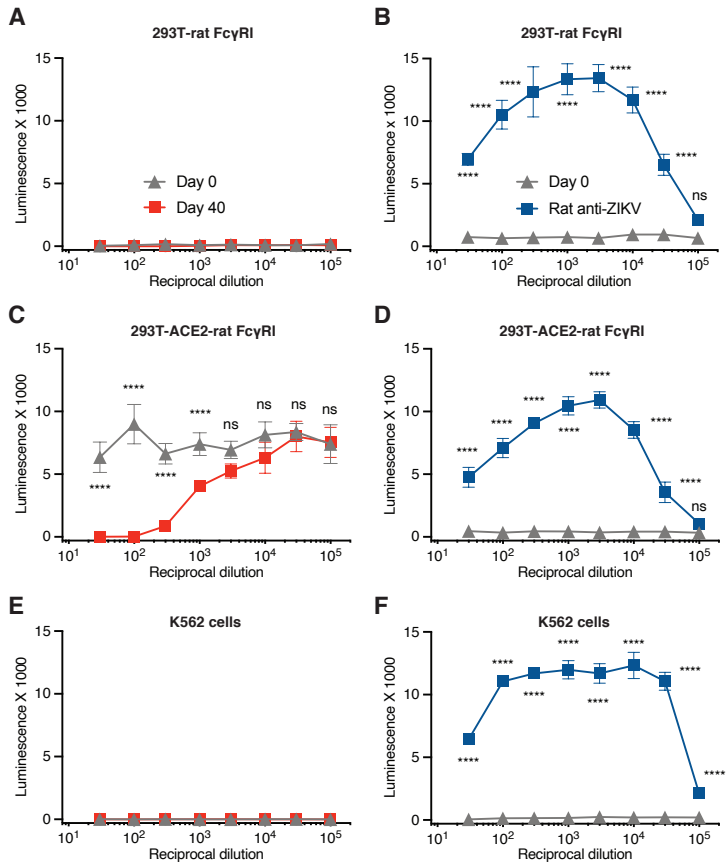

**Fig. S1. Anti-RBD antisera does not mediate antibody-dependent enhancement of SARS-CoV-2 S protein-mediated entry.** (A) HEK293T cells were transfected to express rat Fc $\gamma$ RI and infected with SARS2-PV in the presence of the indicated dilutions of preimmune day 0 or immune day 40 antisera. (B) Experiments similar to those in panel A except that ZIKV VLP and anti-ZIKV antisera, also elicited in Sprague Dawley rats, were compared to preimmune sera. (C, D) Experiments identical to those in panel A and B respectively except that HEK293T cells stably expressing human ACE2 were again transfected to express rat Fc $\gamma$ RI before incubation with SARS2-PV (C) or ZIKV-VLP (D). (E, F) Experiments identical to A and B, respectively, except that the pro-monocytic K562 cell line was incubated with SARS2-PV (E) or ZIKV-VLP (F). Error bars in panels A-F indicate the range of two experiments run in parallel. Significant differences with day-0 preimmune sera are indicated (\*\*\*\* indicates  $P < 0.001$  by two-way ANOVA; ns indicates not significant).
