# Supplementary material for: An Engineered Receptor-Binding Domain Improves the Immunogenicity of Multivalent SARS-CoV-2 Vaccines
Source: PubMed Central journal article supplement (PMC8262850; doi:10.1128/mbio.00930-21), 2021-05-11
Supplement: mbio.00930-21-sf002.pdf [file mbio.00930-21-sf002.pdf]

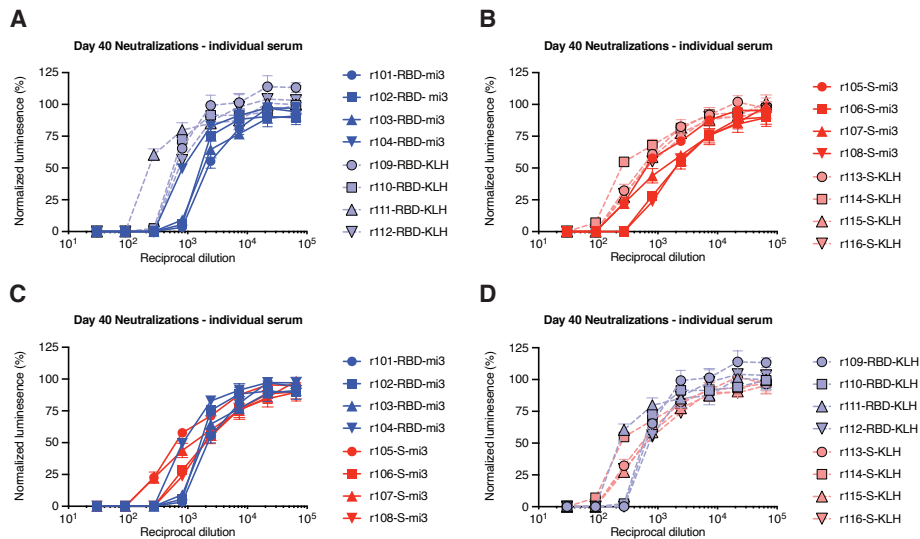

**Fig. S2. RBD/Spike mi3/KLH neutralizations for individual rats.** Four female Sprague Dawley rats for each group were inoculated with either RBD-Spytag or S-protein-Spytag conjugated to either Spycatcher-mi3 particles by isopeptide bond formation, or KLH by EDC. Sera were harvested at day 45 and each serum was compared for its ability to neutralize S-protein-pseudotyped retroviruses (SARS2-PV), by measuring the activity of a firefly-luciferase reporter expressed by these pseudoviruses. **(A)** RBD conjugated to mi3 vs. KLH. **(B)** S-protein conjugated to mi3 vs. KLH. **(C)** mi3 conjugates of RBD vs S-protein. **(D)** KLH conjugates of RBD vs S-protein.
