# Supplementary material for: An Engineered Receptor-Binding Domain Improves the Immunogenicity of Multivalent SARS-CoV-2 Vaccines
Source: PubMed Central journal article supplement (PMC8262850; doi:10.1128/mbio.00930-21), 2021-05-11
Supplement: mbio.00930-21-sf003.pdf [file mbio.00930-21-sf003.pdf]

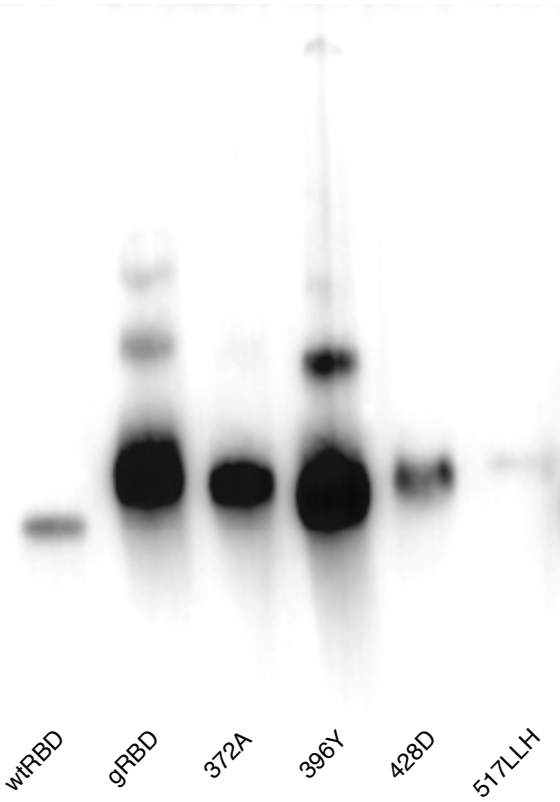

|     |   |   |   |   |   |   |
|-----|---|---|---|---|---|---|
| 370 | - | + | - | + | + | + |
| 394 | - | + | + | - | + | + |
| 428 | - | + | + | + | - | + |
| 517 | - | + | + | + | + | - |

**Fig. S3. Individual glycosylation motifs promote expression of a multimeric RBD fusion protein.** SARS-CoV-2 RBD variants with different combinations of glycosylation motifs, as indicated, were expressed as fusions to the C-terminus of *H. pylori* NAP 12-mer. Native western blots probed with ACE2-Fc-HRP were performed on Expi293 supernatants harvested 5 days post transfection.
