# Supplementary material for: An Engineered Receptor-Binding Domain Improves the Immunogenicity of Multivalent SARS-CoV-2 Vaccines
Source: PubMed Central journal article supplement (PMC8262850; doi:10.1128/mbio.00930-21), 2021-05-11
Supplement: mbio.00930-21-sf004.pdf [file mbio.00930-21-sf004.pdf]

**A**

**gRBD-Fc**  
 MKHLWFFLLVAAPRWVLSNITNLCPPGVEFNATRFASVYAWNRKRISNCVADYVLYNSTFSSTFKCYGVSPTKLN  
 DLCTFTNVTADSFVIRGDEVQRQIAPGQGTGIADYNYKLPDNFTGCVIAWNSNLDKSVGGNYNYLRFKRSNLRKPF  
 RDISTEIQAGSTPCNGVEGFNCYFPLQSYGFPQPTNGVGYQYRVVVLSENLTAAPATVCGPGSSGGSDKTHCTPCPC  
 PAPELLGGPSVFLFPFKPDTLMISTRPEVTCVVVDVSHEDPEVKFNWYVDGVEVHNAKTPRREQYNSTYRVVSVL  
 TVLQDMLNGKEYKCKVKNALPAPEIKETISAKCGPRPEQVTLPPSRDELTKNQVSLTCLVGGFTYPSDIAVEWES  
 NQGFENNYKTTTPVLDSDGSFFLYSKLTVDKSRWQQGNVFCSCVMHEALHNYTQKLSLSLSPGK

**gRBD-foldon**  
 MKHLWFFLLVAAPRWVLSNITNLCPPGVEFNATRFASVYAWNRKRISNCVADYVLYNSTFSSTFKCYGVSPTKLN  
 DLCTFTNVTADSFVIRGDEVQRQIAPGQGTGIADYNYKLPDNFTGCVIAWNSNLDKSVGGNYNYLRFKRSNLRKPF  
 RDISTEIQAGSTPCNGVEGFNCYFPLQSYGFPQPTNGVGYQYRVVVLSENLTAAPATVCGPGSSGGSGPGGIIP  
 EAPRDGQAVRKDGEWLLSTFLGSGGGEPEA

**NAP-gRBD**  
 MKHLWFFLLVAAPRWVLSNITNLCPPGVEFNATRFASVYAWNRKRISNCVADYVLYNSTFSSTFKCYGVSPTKLN  
 DLCTFTNVTADSFVIRGDEVQRQIAPGQGTGIADYNYKLPDNFTGCVIAWNSNLDKSVGGNYNYLRFKRSNLRKPF  
 RDISTEIQAGSTPCNGVEGFNCYFPLQSYGFPQPTNGVGYQYRVVVLSENLTAAPATVCGPGSSGGSGPGGIIP  
 EAPRDGQAVRKDGEWLLSTFLGSGGGEPEA

**gRBD-ferritin**  
 MKHLWFFLLVAAPRWVLSNITNLCPPGVEFNATRFASVYAWNRKRISNCVADYVLYNSTFSSTFKCYGVSPTKLN  
 DLCTFTNVTADSFVIRGDEVQRQIAPGQGTGIADYNYKLPDNFTGCVIAWNSNLDKSVGGNYNYLRFKRSNLRKPF  
 RDISTEIQAGSTPCNGVEGFNCYFPLQSYGFPQPTNGVGYQYRVVVLSENLTAAPATVCGPGSSGGSGPGGIIP  
 EAPRDGQAVRKDGEWLLSTFLGSGGGEPEA

**gRBD-m13**  
 MKHLWFFLLVAAPRWVLSNITNLCPPGVEFNATRFASVYAWNRKRISNCVADYVLYNSTFSSTFKCYGVSPTKLN  
 DLCTFTNVTADSFVIRGDEVQRQIAPGQGTGIADYNYKLPDNFTGCVIAWNSNLDKSVGGNYNYLRFKRSNLRKPF  
 RDISTEIQAGSTPCNGVEGFNCYFPLQSYGFPQPTNGVGYQYRVVVLSENLTAAPATVCGPGSSGGSGPGGIIP  
 EAPRDGQAVRKDGEWLLSTFLGSGGGEPEA

**B**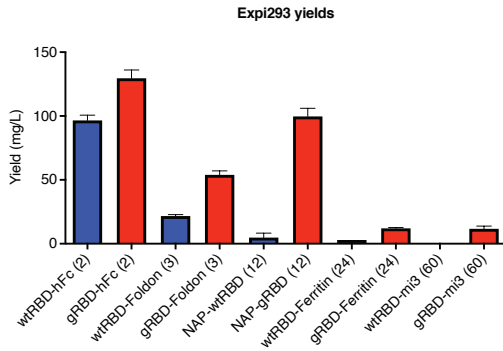**C**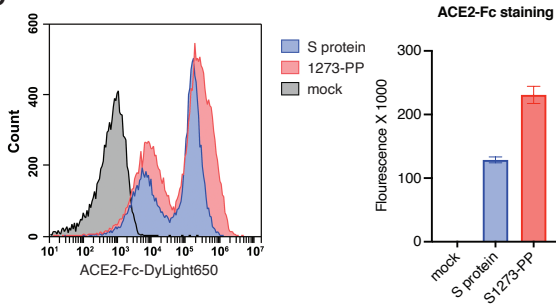

**Fig. S4. Multivalent gRBD fusion proteins express more efficiently than their wtRBD counterparts.** (A) Complete sequences of the multivalent gRBD fusion constructs used in these studies. Green indicated signal peptide; black, linker residues; blue, multivalent carrier protein; red, gRBD; purple, affinity tag. (B) Yields of purified wtRBD and gRBD multimers expressed from the CMV/R vector in Expi293 cells. Values reflect a minimum of two independent transfections. Error bars indicate s.d. (C) Flow cytometry of 293T cells transiently transfected with SARS-CoV2 S protein in the pCAGGS vector, or S1273-PP in the CMVR vector. Expression was measured by staining with ACE2-Fc-DyLight650. Right panel indicates mean fluorescence intensity as determine from the histogram shown in the left panel.
